# Supplementary material for: Spectroscopic evidence of a Xe–Xe bond in the linear Xe2Au+Xe ion
Source: Royal Society of Chemistry journal article supplement (doi:10.1039/d2cc05606b), 2022-11-16
Supplement: d2cc05606b1.pdf [file d2cc05606b1.pdf]

## Supporting information

### Spectroscopic evidence of a Xe-Xe bond in the linear Xe<sub>2</sub>Au<sup>+</sup>Xe ion

Piero Ferrari<sup>1,2,\*</sup>, Joost M. Bakker<sup>2</sup> and Ewald Janssens<sup>1</sup>

<sup>1</sup>Quantum Solid-State Physics, Department of Physics and Astronomy, KU Leuven, Celestijnenlaan 200d, 3001 Leuven, Belgium

<sup>2</sup>Institute for Molecules and Materials, FELIX Laboratory, Radboud University, 6525 ED Nijmegen, Netherlands

#### Content

- i) Infrared spectra of additional isomers
- ii) Comparison of the infrared spectra calculated with different functionals
- iii) Extracting Xe binding energy from temperature-dependent mass spectra
- iv) Energy decomposition analysis
- v) Potential energy surfaces
- vi) Comparison of properties of Xe<sub>2</sub><sup>+</sup>, Xe<sub>2</sub>Au<sup>+</sup>Xe, FXe<sub>2</sub>H and Xe<sub>2</sub>
- vii) XYZ coordinates

i) **Infrared spectra of additional isomers**

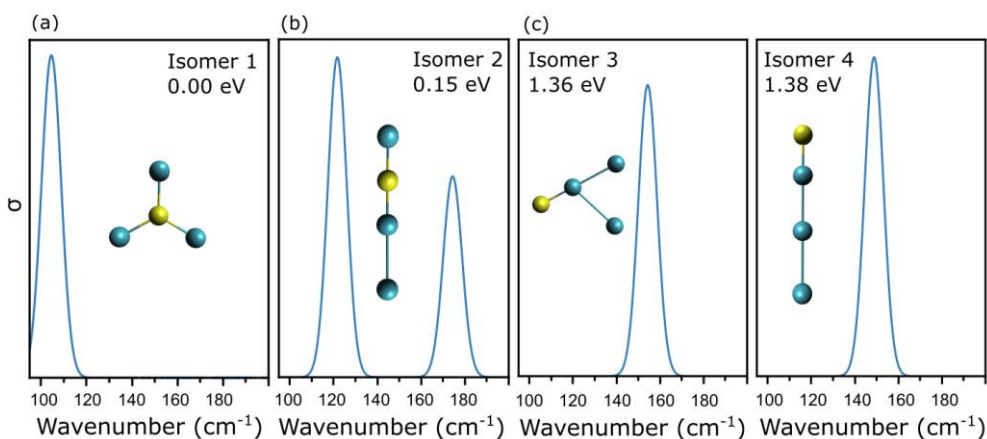

Figure S1. Vibrational spectra of four isomers of  $\text{AuXe}_3^+$ . Isomers 1 and 2 are discussed in the main article. The relative energy, with respect to isomer 1, is calculated with DFT using the PBE functional and the Def2-TZVPP basis set plus the D3 dispersion correction.

ii) **Comparison of the infrared spectra calculated with different functionals**

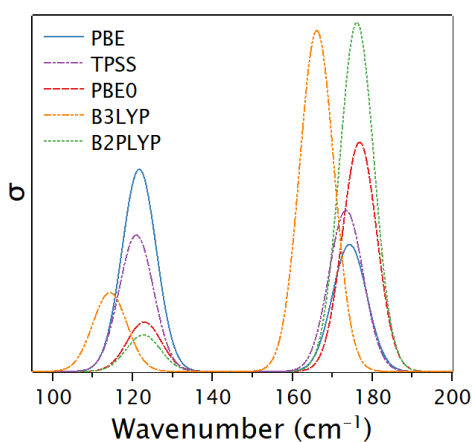

Figure S2. Comparison of the infrared spectrum of isomer 2 calculated using different exchange-correlation functionals. The plots are constructed by Gaussian functions centred around each vibrational mode, with an artificial width of  $10 \text{ cm}^{-1}$ .

iii) **Extracting Xe binding energy from temperature-dependent mass spectra**

In this procedure, it is assumed that the intensities in mass spectra recorded at a certain temperature  $T$  reflect the relative amount of each complex in equilibrium conditions. Under this assumption, the equilibrium constant  $K^0$  at a standard pressure  $p^0$  is given by Eq. (S1) [1].

$$K^0 = \frac{I(\text{AuXe}_3^+, T)}{I(\text{AuXe}_2^+, T) \cdot p(\text{Xe})/p^0} \quad (\text{S1})$$

Here,  $I(X, T)$  is the intensity of the complex  $X$  in a mass spectrum recorded at temperature  $T$ , and  $p(\text{Xe})$  the partial pressure of Xe in the formation chamber of the source. The ratio  $p(\text{Xe})/p^0$  cannot be measured and its precise value is therefore unknown. The equilibrium constant  $K^0$  can be related to the standard enthalpy change  $\Delta H^0$  and the standard entropy change  $\Delta S^0$ , via Eq. (S2):

$$\ln(K^0) = \frac{-\Delta H^0}{R} \frac{1}{T} + \frac{\Delta S^0}{R} \quad (\text{S2})$$

Given the uncertainty in  $p(\text{Xe})/p^0$ , determination of  $\Delta S^0$  is not possible. However, from the slope of a plot of  $\ln(K^0)$  versus  $1/T$  (Figure 2a in main article),  $\Delta H^0$  can be determined. This quantity equals the Xe binding energy in  $\text{AuXe}_2^+\text{-Xe}$ .

[1] E. Janssens, P. Gruene, G. Meijer, L. Wöste, P. Lievens, and A. Fielicke, Phys. Rev. Lett. 99, 063401, 2007.

#### iv) Energy decomposition analysis

Table S1. Absolute values of the different components of the binding energy (in eV) of  $\text{AuXe}_2^+\text{-Xe}$  and  $\text{Xe-Xe}$ , obtained via the energy decomposition analysis (EDA).

| Energy component   | $\text{Au}^+\text{Xe}_2\text{-Xe}$ | $\text{Xe-Xe}$ |
|--------------------|------------------------------------|----------------|
| $E_{\text{orb}}$   | 0.060                              | 0.003          |
| $E_{\text{pauli}}$ | -0.041                             | -0.005         |
| $E_{\text{elec}}$  | 0.017                              | 0.004          |
| $E_{\text{dis}}$   | 0.014                              | 0.008          |

#### v) Potential energy surfaces

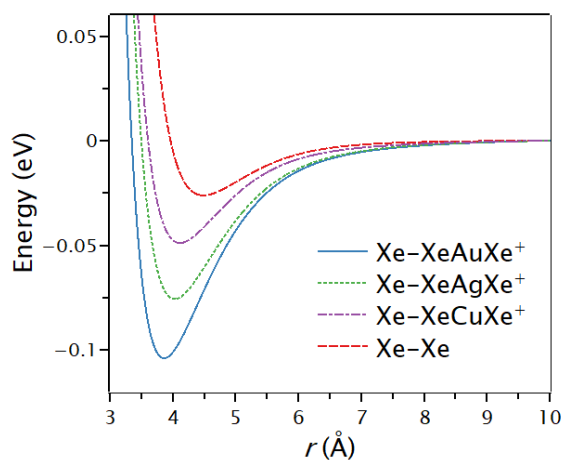

Figure S3. DFT calculated (PBE/Def2-TZVPP+D3) potential energy surface of  $\text{Xe-XeAuXe}^+$  (blue),  $\text{Xe-XeAgXe}^+$  (green),  $\text{Xe-XeCuXe}^+$  (purple) and  $\text{Xe-Xe}$  (red), with  $r$  the Xe-Xe distance.

vi) **Comparison of properties of Xe<sub>2</sub><sup>+</sup>, Xe<sub>2</sub>Au<sup>+</sup>Xe, FXe<sub>2</sub>H and Xe<sub>2</sub>**

Table S2. Values of Xe-Xe bond lengths, Xe-Xe binding energies, Xe-Xe Wiberg bond indexes, partial charge on the Xe atom pair and ELF values at the critical points for Xe<sub>2</sub><sup>+</sup>, Xe<sub>2</sub>Au<sup>+</sup>Xe, FXe<sub>2</sub>H and Xe<sub>2</sub>. Calculations performed at the CCSD(T)/Def2-TZVPP level.

|                                    | Xe-Xe bond length | $E_b$    | Wiberg bond index | Partial charge Xe pair | ELF  |
|------------------------------------|-------------------|----------|-------------------|------------------------|------|
| Xe <sub>2</sub> <sup>+</sup>       | 3.114 Å           | 1.136 eV | 0.5               | +0.500/0.500 e         | 0.20 |
| Xe <sub>2</sub> Au <sup>+</sup> Xe | 4.097 Å           | 0.057 eV | 0.1               | +0.339/0.036 e         | 0.04 |
| FXe <sub>2</sub> H                 | 3.224 Å           | 1.232 eV | 0.6               | +0.312/0.381e          | 0.32 |
| Xe <sub>2</sub>                    | 4.742 Å           | 0.009 eV | 0.0               | 0.000/0.000 e          | 0.01 |

vii) **XYZ coordinates**

Isomer 1

|    |               |               |               |
|----|---------------|---------------|---------------|
| Au | -2.1583604602 | 0.4065837772  | -0.0000097685 |
| Xe | -2.1555404196 | 3.1845736111  | -0.0000885175 |
| Xe | 0.3473386036  | -0.7885678529 | -0.0004539190 |
| Xe | -4.4832877238 | -1.0667255355 | 0.000522050   |

Isomer 2

|    |               |              |               |
|----|---------------|--------------|---------------|
| Au | -4.2509785212 | 0.8675128972 | -0.0000006156 |
| Xe | -6.8719901753 | 0.8785433548 | 0.0000012350  |
| Xe | -1.6366395371 | 0.8539510521 | -0.0000024675 |
| Xe | 2.3084781748  | 0.7857875519 | 0.0000018480  |

Isomer 3

|    |               |              |               |
|----|---------------|--------------|---------------|
| Au | -2.3165677407 | 0.1817121162 | -0.0002431799 |
| Xe | -0.4636253345 | 2.0196335251 | 0.0003000728  |
| Xe | 3.3048157629  | 0.1567951660 | -0.0008318439 |
| Xe | 2.0910060446  | 4.5611039544 | 0.0007749509  |

Isomer 4

|    |               |               |               |
|----|---------------|---------------|---------------|
| Au | -1.9028113062 | 0.0000000265  | -0.0000000082 |
| Xe | 0.7063703226  | -0.0000000207 | 0.0000000141  |
| Xe | 4.4371049033  | -0.0000000491 | -0.0000000145 |
| Xe | 8.7593360804  | 0.0000000432  | 0.0000000086  |
